# Supplementary material for: Genome-Wide Analysis of Basic Helix-Loop-Helix Transcription Factors to Elucidate Candidate Genes Related to Fruit Ripening and Stress in Banana (Musa acuminata L. AAA Group, cv. Cavendish)
Source: Front Plant Sci. 2020 May 27;11:650. doi: 10.3389/fpls.2020.00650 (PMC7267074; doi:10.3389/fpls.2020.00650)
Supplement: Supplementary file 1 [file Data_Sheet_1.xlsx]

## Sheet: Table 1
Table 1. Characteristics of MabHLHs family in banana
Gene name	Gene_ID	Nucleic acid ID	Protein ID	Chromosome	Gene start	Gene end	Length	Size(aa)	MW(kDa)	pI
MabHLH001	Ma01_g00280	Ma01_t00280	Ma01_p00280	chr01	213101	214819	1122	373	40.5529	6.43
MabHLH002	Ma01_g02640	Ma01_t02640	Ma01_p02640	chr01	1762836	1764341	1269	422	47.2109	5.08
MabHLH003	Ma01_g02760	Ma01_t02760	Ma01_p02760	chr01	1815991	1817188	1038	345	38.93	5.31
MabHLH004	Ma01_g03440	Ma01_t03440	Ma01_p03440	chr01	2276696	2278060	1365	454	49.0117	6.79
MabHLH005	Ma01_g05550	Ma01_t05550	Ma01_p05550	chr01	3920891	3922514	501	166	18.852	9.64
MabHLH006	Ma01_g07890	Ma01_t07890	Ma01_p07890	chr01	5682536	5684377	1842	613	66.9714	6.51
MabHLH007	Ma01_g07920	Ma01_t07920	Ma01_p07920	chr01	5704698	5705516	819	272	29.9999	6.62
MabHLH008	Ma01_g10120	Ma01_t10120	Ma01_p10120	chr01	7253763	7257141	1053	350	37.4805	5.13
MabHLH009	Ma01_g12160	Ma01_t12160	Ma01_p12160	chr01	8836059	8837402	1344	447	48.1195	5.99
MabHLH010	Ma01_g12260	Ma01_t12260	Ma01_p12260	chr01	8884129	8886752	2001	666	71.7143	6.2
MabHLH011	Ma01_g12390	Ma01_t12390	Ma01_p12390	chr01	8982309	8984996	1479	492	53.8472	6.98
MabHLH012	Ma01_g12830	Ma01_t12830	Ma01_p12830	chr01	9383223	9387653	1137	378	39.8908	7.72
MabHLH013	Ma01_g14360	Ma01_t14360	Ma01_p14360	chr01	10494193	10495920	825	274	30.4872	5.82
MabHLH014	Ma01_g14630	Ma01_t14630	Ma01_p14630	chr01	10687083	10689060	1194	397	42.6342	6.24
MabHLH015	Ma01_g17410	Ma01_t17410	Ma01_p17410	chr01	12759163	12760535	1200	399	43.7814	6.13
MabHLH016	Ma01_g19840	Ma01_t19840	Ma01_p19840	chr01	15712057	15713218	936	311	34.4723	4.84
MabHLH017	Ma01_g20760	Ma01_t20760	Ma01_p20760	chr01	19511401	19512888	996	331	36.1431	5.95
MabHLH018	Ma01_g21980	Ma01_t21980	Ma01_p21980	chr01	22344241	22345494	900	299	32.5991	5.3
MabHLH019	Ma01_g22460	Ma01_t22460	Ma01_p22460	chr01	24915300	24920881	1059	352	37.6517	6.46
MabHLH020	Ma01_g22810	Ma01_t22810	Ma01_p22810	chr01	25964743	25965963	1221	406	45.4278	5.89
MabHLH021	Ma01_g23240	Ma01_t23240	Ma01_p23240	chr01	27456609	27458348	1740	579	63.6575	6.01
MabHLH022	Ma02_g07380	Ma02_t07380	Ma02_p07380	chr02	18084208	18088402	1008	335	36.9709	5.58
MabHLH023	Ma02_g07980	Ma02_t07980	Ma02_p07980	chr02	18466673	18470305	1371	456	49.643	5.36
MabHLH024	Ma02_g08030	Ma02_t08030	Ma02_p08030	chr02	18503750	18505682	1437	478	51.4602	6.1
MabHLH025	Ma02_g09300	Ma02_t09300	Ma02_p09300	chr02	19381178	19381534	261	86	9.63292	7.93
MabHLH026	Ma02_g09310	Ma02_t09310	Ma02_p09310	chr02	19387907	19388270	282	93	10.4722	9.17
MabHLH027	Ma02_g10480	Ma02_t10480	Ma02_p10480	chr02	20022624	20023743	840	279	31.104	8.63
MabHLH028	Ma02_g11480	Ma02_t11480	Ma02_p11480	chr02	20609466	20610915	927	308	33.238	7.16
MabHLH029	Ma02_g16200	Ma02_t16200	Ma02_p16200	chr02	23672236	23673338	525	174	19.949	9.38
MabHLH030	Ma02_g16270	Ma02_t16270	Ma02_p16270	chr02	23712891	23713988	525	174	19.9672	9.38
MabHLH031	Ma02_g16490	Ma02_t16490	Ma02_p16490	chr02	23830384	23831079	696	231	25.4708	6.75
MabHLH032	Ma02_g16690	Ma02_t16690	Ma02_p16690	chr02	23939808	23940182	279	92	10.4498	9.18
MabHLH033	Ma02_g18870	Ma02_t18870	Ma02_p18870	chr02	25238897	25240206	1011	336	36.0029	4.89
MabHLH034	Ma02_g19840	Ma02_t19840	Ma02_p19840	chr02	25985269	25987386	2118	705	76.5096	5.65
MabHLH035	Ma02_g21930	Ma02_t21930	Ma02_p21930	chr02	27414863	27417301	750	249	27.2412	9.42
MabHLH036	Ma02_g23120	Ma02_t23120	Ma02_p23120	chr02	28271611	28273738	1512	503	53.8005	6.69
MabHLH037	Ma02_g23310	Ma02_t23310	Ma02_p23310	chr02	28379154	28380660	984	327	35.76	7
MabHLH038	Ma02_g24160	Ma02_t24160	Ma02_p24160	chr02	28869662	28870629	888	295	33.14	9.29
MabHLH039	Ma02_g24740	Ma02_t24740	Ma02_p24740	chr02	29212287	29213711	969	322	35.28	6.33
MabHLH040	Ma03_g00290	Ma03_t00290	Ma03_p00290	chr03	280072	281727	1656	551	59.39	5.67
MabHLH041	Ma03_g00570	Ma03_t00570	Ma03_p00570	chr03	475796	477004	948	315	35.34	4.92
MabHLH042	Ma03_g01140	Ma03_t01140	Ma03_p01140	chr03	884806	886020	792	263	28.81	5.77
MabHLH043	Ma03_g01460	Ma03_t01460	Ma03_p01460	chr03	1049710	1050061	279	92	10.23	6.72
MabHLH044	Ma03_g02360	Ma03_t02360	Ma03_p02360	chr03	1609052	1611081	1458	485	52.32	6.21
MabHLH045	Ma03_g03320	Ma03_t03320	Ma03_p03320	chr03	2230370	2232045	726	241	26.51	9.76
MabHLH046	Ma03_g04500	Ma03_t04500	Ma03_p04500	chr03	2935565	2938594	1443	480	48.63	6
MabHLH047	Ma03_g06310	Ma03_t06310	Ma03_p06310	chr03	4378336	4381909	1386	461	51.08	8.95
MabHLH048	Ma03_g06610	Ma03_t06610	Ma03_p06610	chr03	4545966	4547510	948	315	34.81	6.21
MabHLH049	Ma03_g06720	Ma03_t06720	Ma03_p06720	chr03	4620036	4620736	618	205	22.35	10.34
MabHLH050	Ma03_g06950	Ma03_t06950	Ma03_p06950	chr03	4772002	4772697	696	231	25.12	6.71
MabHLH051	Ma03_g09890	Ma03_t09890	Ma03_p09890	chr03	7357210	7361223	1638	545	58.37	6.1
MabHLH052	Ma03_g10320	Ma03_t10320	Ma03_p10320	chr03	7765011	7767648	1386	461	49.57	5.97
MabHLH053	Ma03_g10360	Ma03_t10360	Ma03_p10360	chr03	7794392	7797790	1368	455	49.95	8.55
MabHLH054	Ma03_g10840	Ma03_t10840	Ma03_p10840	chr03	8185873	8187559	1089	362	39.83	9.02
MabHLH055	Ma03_g14530	Ma03_t14530	Ma03_p14530	chr03	13238723	13240446	1170	389	42.46	6.24
MabHLH056	Ma03_g16110	Ma03_t16110	Ma03_p16110	chr03	17843212	17844457	990	329	36.48	6.21
MabHLH057	Ma03_g16180	Ma03_t16180	Ma03_p16180	chr03	18197314	18199104	1791	596	65.98	6.37
MabHLH058	Ma03_g17630	Ma03_t17630	Ma03_p17630	chr03	23232705	23234197	930	309	33.75	7.7
MabHLH059	Ma03_g18660	Ma03_t18660	Ma03_p18660	chr03	24209729	24213134	1926	641	71.62	5.61
MabHLH060	Ma03_g19700	Ma03_t19700	Ma03_p19700	chr03	24959602	24960942	987	328	35.55	5.44
MabHLH061	Ma03_g20780	Ma03_t20780	Ma03_p20780	chr03	25873133	25873481	258	85	9.54	9.61
MabHLH062	Ma03_g21690	Ma03_t21690	Ma03_p21690	chr03	26634849	26635679	537	178	20.32	9.04
MabHLH063	Ma03_g22400	Ma03_t22400	Ma03_p22400	chr03	27151719	27152073	279	92	10.39	9.28
MabHLH064	Ma03_g24270	Ma03_t24270	Ma03_p24270	chr03	28559323	28564137	693	230	25.36	5.28
MabHLH065	Ma03_g27160	Ma03_t27160	Ma03_p27160	chr03	30634157	30635215	1059	352	38.806	5.74
MabHLH066	Ma03_g27360	Ma03_t27360	Ma03_p27360	chr03	30791973	30793084	1026	341	37.714	8.99
MabHLH067	Ma03_g30510	Ma03_t30510	Ma03_p30510	chr03	33125488	33127675	840	279	31.006	7.68
MabHLH068	Ma03_g31810	Ma03_t31810	Ma03_p31810	chr03	33891455	33892700	975	324	35.728	5.66
MabHLH069	Ma04_g00510	Ma04_t00510	Ma04_p00510	chr04	449679	450045	279	92	10.087	8.02
MabHLH070	Ma04_g01920	Ma04_t01920	Ma04_p01920	chr04	1673747	1676850	1323	440	44.816	5.94
MabHLH071	Ma04_g03270	Ma04_t03270	Ma04_p03270	chr04	2543250	2544537	984	327	35.889	8.99
MabHLH072	Ma04_g03280	Ma04_t03280	Ma04_p03280	chr04	2547708	2549087	1050	349	38.641	5.78
MabHLH073	Ma04_g05320	Ma04_t05320	Ma04_p05320	chr04	3971841	3974567	690	229	25.837	9.27
MabHLH074	Ma04_g05360	Ma04_t05360	Ma04_p05360	chr04	3988479	3991258	690	229	25.726	6.01
MabHLH075	Ma04_g08700	Ma04_t08700	Ma04_p08700	chr04	6195650	6196852	1203	400	43.408	5.35
MabHLH076	Ma04_g09100	Ma04_t09100	Ma04_p09100	chr04	6484861	6486144	1284	427	46.7	6.25
MabHLH077	Ma04_g11130	Ma04_t11130	Ma04_p11130	chr04	7833734	7834899	702	233	25.796	9.43
MabHLH078	Ma04_g12690	Ma04_t12690	Ma04_p12690	chr04	9582784	9586993	648	215	23.891	9.17
MabHLH079	Ma04_g14560	Ma04_t14560	Ma04_p14560	chr04	11025232	11026784	1026	341	37.658	5.2
MabHLH080	Ma04_g16140	Ma04_t16140	Ma04_p16140	chr04	14862750	14864898	1374	457	50.413	5.89
MabHLH081	Ma04_g16400	Ma04_t16400	Ma04_p16400	chr04	15565449	15566696	1248	415	46.103	8.28
MabHLH082	Ma04_g17530	Ma04_t17530	Ma04_p17530	chr04	17908149	17910287	1248	415	77.46	5.38
MabHLH083	Ma04_g17980	Ma04_t17980	Ma04_p17980	chr04	19329351	19334009	2139	712	28.882	5.91
MabHLH084	Ma04_g19280	Ma04_t19280	Ma04_p19280	chr04	21887714	21888331	792	263	22.467	6.04
MabHLH085	Ma04_g26180	Ma04_t26180	Ma04_p26180	chr04	27731794	27736358	1170	389	35.949	5.06
MabHLH086	Ma04_g27680	Ma04_t27680	Ma04_p27680	chr04	28860260	28864794	984	327	32.266	6.19
MabHLH087	Ma04_g29590	Ma04_t29590	Ma04_p29590	chr04	30487440	30488772	903	300	35.173	8.77
MabHLH088	Ma04_g29760	Ma04_t29760	Ma04_p29760	chr04	30599290	30600538	972	323	33.03	4.81
MabHLH089	Ma04_g30630	Ma04_t30630	Ma04_p30630	chr04	31224517	31224865	258	85	9.641	10
MabHLH090	Ma04_g30910	Ma04_t30910	Ma04_p30910	chr04	31406043	31407039	762	253	27.452	6.44
MabHLH091	Ma04_g38300	Ma04_t38300	Ma04_p38300	chr04	35891079	35893420	1629	542	58.663	5.91
MabHLH092	Ma05_g01190	Ma05_t01190	Ma05_p01190	chr05	715469	716014	546	181	19.915	6.6
MabHLH093	Ma05_g02230	Ma05_t02230	Ma05_p02230	chr05	1418364	1420590	1608	535	58.801	6.15
MabHLH094	Ma05_g02990	Ma05_t02990	Ma05_p02990	chr05	2068388	2074860	909	302	32.345	6.18
MabHLH095	Ma05_g05190	Ma05_t05190	Ma05_p05190	chr05	3969594	3970639	864	287	31.272	6.16
MabHLH096	Ma05_g06550	Ma05_t06550	Ma05_p06550	chr05	4850983	4852258	936	311	33.872	5.94
MabHLH097	Ma05_g08730	Ma05_t08730	Ma05_p08730	chr05	6439461	6440871	486	161	18.551	9.47
MabHLH098	Ma05_g09200	Ma05_t09200	Ma05_p09200	chr05	6697429	6698732	615	204	22.66	5.34
MabHLH099	Ma05_g15880	Ma05_t15880	Ma05_p15880	chr05	13101968	13102304	258	85	9.51	9.5
MabHLH100	Ma05_g19380	Ma05_t19380	Ma05_p19380	chr05	27799576	27802401	1206	401	45.5	6.06
MabHLH101	Ma05_g20130	Ma05_t20130	Ma05_p20130	chr05	31697777	31698985	1326	441	31.45	8.42
MabHLH102	Ma05_g20340	Ma05_t20340	Ma05_p20340	chr05	31989081	31991153	849	282	74.39	5.47
MabHLH103	Ma05_g20730	Ma05_t20730	Ma05_p20730	chr05	32390873	32393217	2073	690	64.7	5.53
MabHLH104	Ma05_g22710	Ma05_t22710	Ma05_p22710	chr05	34505748	34507297	1821	606	44.12	6.74
MabHLH105	Ma05_g23010	Ma05_t23010	Ma05_p23010	chr05	34852520	34863817	1182	393	76.07	5.47
MabHLH106	Ma05_g24730	Ma05_t24730	Ma05_p24730	chr05	36902054	36904031	1281	426	46.47	7.16
MabHLH107	Ma05_g25740	Ma05_t25740	Ma05_p25740	chr05	37589174	37589651	393	130	14.7	9.61
MabHLH108	Ma05_g26050	Ma05_t26050	Ma05_p26050	chr05	37824539	37825425	591	196	21.33	6.95
MabHLH109	Ma05_g31750	Ma05_t31750	Ma05_p31750	chr05	41544341	41545516	702	233	25.98	6.61
MabHLH110	Ma06_g00430	Ma06_t00430	Ma06_p00430	chr06	352325	354034	1422	473	51.75	6.74
MabHLH111	Ma06_g02630	Ma06_t02630	Ma06_p02630	chr06	2021960	2024536	1563	520	57.81	6.65
MabHLH112	Ma06_g02880	Ma06_t02880	Ma06_p02880	chr06	2172246	2173919	1473	490	54.41	4.93
MabHLH113	Ma06_g03850	Ma06_t03850	Ma06_p03850	chr06	2781735	2783012	915	304	33.17	5.41
MabHLH114	Ma06_g04430	Ma06_t04430	Ma06_p04430	chr06	3211271	3211619	258	85	9.49	9.61
MabHLH115	Ma06_g09400	Ma06_t09400	Ma06_p09400	chr06	6596169	6597261	864	287	31.4	4.56
MabHLH116	Ma06_g09680	Ma06_t09680	Ma06_p09680	chr06	6742259	6746066	1659	552	58.07	5.06
MabHLH117	Ma06_g10630	Ma06_t10630	Ma06_p10630	chr06	7333415	7335202	1101	366	39.77	8.28
MabHLH118	Ma06_g10910	Ma06_t10910	Ma06_p10910	chr06	7616616	7618176	1020	339	36.98	5.3
MabHLH119	Ma06_g11260	Ma06_t11260	Ma06_p11260	chr06	7899717	7900740	678	225	25.1	7.6
MabHLH120	Ma06_g11760	Ma06_t11760	Ma06_p11760	chr06	8201330	8202446	942	313	34.25	6.02
MabHLH121	Ma06_g17980	Ma06_t17980	Ma06_p17980	chr06	12201766	12203278	975	324	35.53	6.09
MabHLH122	Ma06_g18360	Ma06_t18360	Ma06_p18360	chr06	12475352	12476622	936	311	34.54	5.32
MabHLH123	Ma06_g19890	Ma06_t19890	Ma06_p19890	chr06	13985373	13986041	669	222	24.36	5.81
MabHLH124	Ma06_g24180	Ma06_t24180	Ma06_p24180	chr06	22641977	22645455	1764	587	65.68	5.66
MabHLH125	Ma06_g26210	Ma06_t26210	Ma06_p26210	chr06	27875428	27877004	1035	344	37.84	7.09
MabHLH126	Ma06_g29370	Ma06_t29370	Ma06_p29370	chr06	30765786	30766867	915	304	33.26	4.74
MabHLH127	Ma06_g29530	Ma06_t29530	Ma06_p29530	chr06	30887268	30889336	1572	523	56.18	5.93
MabHLH128	Ma06_g31780	Ma06_t31780	Ma06_p31780	chr06	32817903	32821270	1116	371	41.01	8.28
MabHLH129	Ma06_g32270	Ma06_t32270	Ma06_p32270	chr06	33200733	33202398	1011	336	36.36	5.5
MabHLH130	Ma06_g32610	Ma06_t32610	Ma06_p32610	chr06	33510526	33513169	726	241	27.28	5.85
MabHLH131	Ma06_g33060	Ma06_t33060	Ma06_p33060	chr06	33839405	33841346	1248	415	45.6	6.1
MabHLH132	Ma06_g37230	Ma06_t37230	Ma06_p37230	chr06	36363051	36363417	258	85	9.74	7.93
MabHLH133	Ma06_g37600	Ma06_t37600	Ma06_p37600	chr06	36598076	36599683	1608	535	59.37	7.12
MabHLH134	Ma06_g37700	Ma06_t37700	Ma06_p37700	chr06	36690276	36692501	1320	439	48.63	5.87
MabHLH135	Ma06_g38080	Ma06_t38080	Ma06_p38080	chr06	36948249	36955336	1020	339	36.96	5.35
MabHLH136	Ma06_g38110	Ma06_t38110	Ma06_p38110	chr06	36979000	36981267	1080	359	38.99	8.56
MabHLH137	Ma07_g00790	Ma07_t00790	Ma07_p00790	chr07	652078	653753	939	312	33.98	5.82
MabHLH138	Ma07_g01740	Ma07_t01740	Ma07_p01740	chr07	1355329	1359676	789	262	28.83	6.16
MabHLH139	Ma07_g02820	Ma07_t02820	Ma07_p02820	chr07	2221288	2223344	1437	478	51.87	6.12
MabHLH140	Ma07_g04040	Ma07_t04040	Ma07_p04040	chr07	3033090	3034243	912	303	33.41	4.77
MabHLH141	Ma07_g04290	Ma07_t04290	Ma07_p04290	chr07	3213694	3216411	681	226	25.06	5.67
MabHLH142	Ma07_g04810	Ma07_t04810	Ma07_p04810	chr07	3523663	3525504	1842	613	66.73	6.06
MabHLH143	Ma07_g06450	Ma07_t06450	Ma07_p06450	chr07	4640120	4644115	1050	349	36.59	6.4
MabHLH144	Ma07_g07300	Ma07_t07300	Ma07_p07300	chr07	5342202	5343858	1002	333	36.35	5.25
MabHLH145	Ma07_g08910	Ma07_t08910	Ma07_p08910	chr07	6665187	6667675	1656	551	61.31	6.35
MabHLH146	Ma07_g10540	Ma07_t10540	Ma07_p10540	chr07	7852830	7860511	969	322	35.47	9.2
MabHLH147	Ma07_g10610	Ma07_t10610	Ma07_p10610	chr07	7908628	7910739	678	225	25.12	9.32
MabHLH148	Ma07_g11370	Ma07_t11370	Ma07_p11370	chr07	8444708	8445108	276	91	10.27	7.93
MabHLH149	Ma07_g11850	Ma07_t11850	Ma07_p11850	chr07	8790497	8791610	525	174	20.19	9.71
MabHLH150	Ma07_g12620	Ma07_t12620	Ma07_p12620	chr07	9514586	9515993	984	327	35.92	6.22
MabHLH151	Ma07_g13630	Ma07_t13630	Ma07_p13630	chr07	10244906	10245615	549	182	20.24	9.15
MabHLH152	Ma07_g14560	Ma07_t14560	Ma07_p14560	chr07	11000196	11001965	1770	589	64.51	6.36
MabHLH153	Ma07_g15780	Ma07_t15780	Ma07_p15780	chr07	11997514	11999832	783	260	29.95	4.81
MabHLH154	Ma07_g19250	Ma07_t19250	Ma07_p19250	chr07	27293646	27293984	258	85	9.71	7.94
MabHLH155	Ma07_g21600	Ma07_t21600	Ma07_p21600	chr07	29668099	29674099	1026	341	37.65	5.17
MabHLH156	Ma07_g22050	Ma07_t22050	Ma07_p22050	chr07	30127628	30129296	1251	416	45.6	7.11
MabHLH157	Ma07_g22330	Ma07_t22330	Ma07_p22330	chr07	30318568	30323621	1038	345	37.57	5.74
MabHLH158	Ma07_g22650	Ma07_t22650	Ma07_p22650	chr07	30519595	30520406	579	192	21.37	8.93
MabHLH159	Ma07_g22730	Ma07_t22730	Ma07_p22730	chr07	30559197	30560043	597	198	21.98	8.28
MabHLH160	Ma07_g22890	Ma07_t22890	Ma07_p22890	chr07	30681066	30682422	741	246	28.13	4.91
MabHLH161	Ma07_g24260	Ma07_t24260	Ma07_p24260	chr07	31671774	31673591	1344	447	48.8	6.38
MabHLH162	Ma07_g24870	Ma07_t24870	Ma07_p24870	chr07	32048619	32049161	543	180	20.24	9.45
MabHLH163	Ma07_g28500	Ma07_t28500	Ma07_p28500	chr07	34517967	34519188	1005	334	36.55	5.66
MabHLH164	Ma08_g01270	Ma08_t01270	Ma08_p01270	chr08	1188393	1192799	972	323	34.97	6.52
MabHLH165	Ma08_g05010	Ma08_t05010	Ma08_p05010	chr08	3437794	3438976	936	311	34.123	8.09
MabHLH166	Ma08_g05210	Ma08_t05210	Ma08_p05210	chr08	3578942	3580792	1851	616	67.7	6.08
MabHLH167	Ma08_g08860	Ma08_t08860	Ma08_p08860	chr08	6309503	6310117	366	121	14.03	8.86
MabHLH168	Ma08_g10850	Ma08_t10850	Ma08_p10850	chr08	7966939	7969838	1308	435	47.07	7.74
MabHLH169	Ma08_g11190	Ma08_t11190	Ma08_p11190	chr08	8249062	8252911	1965	654	73.58	5.85
MabHLH170	Ma08_g12100	Ma08_t12100	Ma08_p12100	chr08	9114703	9121365	1437	478	53.19	7
MabHLH171	Ma08_g14280	Ma08_t14280	Ma08_p14280	chr08	11690731	11691092	282	93	10.36	9.75
MabHLH172	Ma08_g14610	Ma08_t14610	Ma08_p14610	chr08	13761957	13763108	762	253	28.6	6.02
MabHLH173	Ma08_g15640	Ma08_t15640	Ma08_p15640	chr08	15825949	15828072	2124	707	76	5.82
MabHLH174	Ma08_g17380	Ma08_t17380	Ma08_p17380	chr08	25013886	25015157	912	303	33.7	6.27
MabHLH175	Ma08_g18460	Ma08_t18460	Ma08_p18460	chr08	30821512	30821879	264	87	9.69	9.03
MabHLH176	Ma08_g19780	Ma08_t19780	Ma08_p19780	chr08	33669722	33672124	534	177	19.75	8.51
MabHLH177	Ma08_g20350	Ma08_t20350	Ma08_p20350	chr08	34442695	34443585	750	249	27.67	7.81
MabHLH178	Ma08_g20960	Ma08_t20960	Ma08_p20960	chr08	34991599	34992331	525	174	19.09	9.73
MabHLH179	Ma08_g21160	Ma08_t21160	Ma08_p21160	chr08	35136361	35142839	1026	341	37.7	5.05
MabHLH180	Ma08_g22850	Ma08_t22850	Ma08_p22850	chr08	36321242	36322145	723	240	28	8.22
MabHLH181	Ma08_g24050	Ma08_t24050	Ma08_p24050	chr08	37343151	37343675	525	174	19.56	8.55
MabHLH182	Ma08_g24730	Ma08_t24730	Ma08_p24730	chr08	37818651	37819709	732	243	27.33	4.89
MabHLH183	Ma08_g25290	Ma08_t25290	Ma08_p25290	chr08	38201438	38203963	1245	414	44.95	5.93
MabHLH184	Ma08_g25740	Ma08_t25740	Ma08_p25740	chr08	38471462	38472508	1047	348	38.29	5.96
MabHLH185	Ma08_g27020	Ma08_t27020	Ma08_p27020	chr08	39420025	39421854	1830	609	66.53	6.09
MabHLH186	Ma08_g27190	Ma08_t27190	Ma08_p27190	chr08	39514446	39516036	987	328	36.48	6.04
MabHLH187	Ma08_g28960	Ma08_t28960	Ma08_p28960	chr08	40742032	40742823	600	199	22.45	9.65
MabHLH188	Ma08_g32450	Ma08_t32450	Ma08_p32450	chr08	43146648	43151687	1041	346	36.41	6.71
MabHLH189	Ma08_g33520	Ma08_t33520	Ma08_p33520	chr08	43788744	43792068	681	226	24.97	5.6
MabHLH190	Ma08_g34470	Ma08_t34470	Ma08_p34470	chr08	44439663	44440883	957	318	35.07	4.76
MabHLH191	Ma08_g34780	Ma08_t34780	Ma08_p34780	chr08	44764331	44764924	534	177	19.12	6.32
MabHLH192	Ma09_g00560	Ma09_t00560	Ma09_p00560	chr09	407966	409816	747	248	27.15	5.23
MabHLH193	Ma09_g07040	Ma09_t07040	Ma09_p07040	chr09	4533591	4535136	1245	414	44.27	9.04
MabHLH194	Ma09_g08430	Ma09_t08430	Ma09_p08430	chr09	5570498	5571805	714	237	26.23	8.31
MabHLH195	Ma09_g08670	Ma09_t08670	Ma09_p08670	chr09	5753178	5753526	258	85	9.66	7.93
MabHLH196	Ma09_g09230	Ma09_t09230	Ma09_p09230	chr09	6126096	6127343	699	232	26.03	5.26
MabHLH197	Ma09_g09380	Ma09_t09380	Ma09_p09380	chr09	6182895	6184548	1023	340	37.54	5.85
MabHLH198	Ma09_g10630	Ma09_t10630	Ma09_p10630	chr09	7215966	7219123	1074	357	28.02	6.72
MabHLH199	Ma09_g10920	Ma09_t10920	Ma09_p10920	chr09	7398582	7402331	954	317	39.02	5.37
MabHLH200	Ma09_g14430	Ma09_t14430	Ma09_p14430	chr09	9868338	9869576	597	198	33.76	8.36
MabHLH201	Ma09_g14550	Ma09_t14550	Ma09_p14550	chr09	9937489	9938172	756	251	21.62	10.25
MabHLH202	Ma09_g14780	Ma09_t14780	Ma09_p14780	chr09	10099174	10099929	1335	444	26.98	5.5
MabHLH203	Ma09_g17480	Ma09_t17480	Ma09_p17480	chr09	13056571	13059717	1458	485	52.15	5.64
MabHLH204	Ma09_g17870	Ma09_t17870	Ma09_p17870	chr09	13474765	13477742	1209	402	43.72	5.41
MabHLH205	Ma09_g17890	Ma09_t17890	Ma09_p17890	chr09	13502442	13504912	1056	351	38.13	7.83
MabHLH206	Ma09_g19970	Ma09_t19970	Ma09_p19970	chr09	27009232	27018824	996	331	36.13	5.45
MabHLH207	Ma09_g20790	Ma09_t20790	Ma09_p20790	chr09	30083474	30089514	1164	387	41.8	8.94
MabHLH208	Ma09_g21380	Ma09_t21380	Ma09_p21380	chr09	32368484	32369737	1254	417	44.74	7
MabHLH209	Ma09_g22830	Ma09_t22830	Ma09_p22830	chr09	34708833	34711371	909	302	33.1	10.17
MabHLH210	Ma09_g23450	Ma09_t23450	Ma09_p23450	chr09	35282757	35283869	855	284	31.73	7.05
MabHLH211	Ma09_g26010	Ma09_t26010	Ma09_p26010	chr09	37372542	37378555	900	299	32.08	6.56
MabHLH212	Ma09_g28100	Ma09_t28100	Ma09_p28100	chr09	38935183	38935549	261	86	9.87	8.97
MabHLH213	Ma09_g28400	Ma09_t28400	Ma09_p28400	chr09	39169648	39171553	1173	390	42.76	8.41
MabHLH214	Ma09_g28720	Ma09_t28720	Ma09_p28720	chr09	39378707	39384103	1581	526	57.39	7.68
MabHLH215	Ma09_g28730	Ma09_t28730	Ma09_p28730	chr09	39388902	39390913	921	306	34.24	7.81
MabHLH216	Ma09_g29710	Ma09_t29710	Ma09_p29710	chr09	40094990	40095683	639	212	23.05	8.97
MabHLH217	Ma10_g00280	Ma10_t00280	Ma10_p00280	chr10	1524018	1526418	1512	503	55.43	6.93
MabHLH218	Ma10_g02630	Ma10_t02630	Ma10_p02630	chr10	8510914	8511835	744	247	28.42	6.09
MabHLH219	Ma10_g05870	Ma10_t05870	Ma10_p05870	chr10	17251853	17252937	648	215	24.26	5.39
MabHLH220	Ma10_g06760	Ma10_t06760	Ma10_p06760	chr10	20255545	20266561	900	299	32.87	6.1
MabHLH221	Ma10_g08560	Ma10_t08560	Ma10_p08560	chr10	22910254	22911453	1200	399	43.27	6.07
MabHLH222	Ma10_g09140	Ma10_t09140	Ma10_p09140	chr10	23337577	23337910	258	85	9.5	6.28
MabHLH223	Ma10_g10030	Ma10_t10030	Ma10_p10030	chr10	24138063	24141089	999	332	36.04	4.95
MabHLH224	Ma10_g12220	Ma10_t12220	Ma10_p12220	chr10	25412890	25414342	942	313	34.65	5.95
MabHLH225	Ma10_g12250	Ma10_t12250	Ma10_p12250	chr10	25435194	25438191	1671	556	58.65	5.14
MabHLH226	Ma10_g14490	Ma10_t14490	Ma10_p14490	chr10	26920416	26921852	771	256	27.81	9.49
MabHLH227	Ma10_g17170	Ma10_t17170	Ma10_p17170	chr10	28661047	28663247	1602	533	57.33	6.72
MabHLH228	Ma10_g18370	Ma10_t18370	Ma10_p18370	chr10	29311483	29314914	1626	541	57.43	5.08
MabHLH229	Ma10_g18400	Ma10_t18400	Ma10_p18400	chr10	29335982	29336993	702	233	25.42	8.85
MabHLH230	Ma10_g19220	Ma10_t19220	Ma10_p19220	chr10	29850828	29851920	1020	339	36.7	9.8
MabHLH231	Ma10_g19830	Ma10_t19830	Ma10_p19830	chr10	30243343	30245177	873	290	31.53	5.44
MabHLH232	Ma10_g20230	Ma10_t20230	Ma10_p20230	chr10	30476999	30478413	897	298	32.61	7.66
MabHLH233	Ma10_g20480	Ma10_t20480	Ma10_p20480	chr10	30625569	30627656	1131	376	41.41	6.27
MabHLH234	Ma10_g21150	Ma10_t21150	Ma10_p21150	chr10	31086449	31089272	1305	434	48.78	8.42
MabHLH235	Ma10_g22250	Ma10_t22250	Ma10_p22250	chr10	31717109	31718875	1767	588	64.51	5.86
MabHLH236	Ma10_g23280	Ma10_t23280	Ma10_p23280	chr10	32309430	32311664	483	160	18.26	4.74
MabHLH237	Ma10_g23960	Ma10_t23960	Ma10_p23960	chr10	32691646	32694113	1125	374	38.8	7.28
MabHLH238	Ma10_g25430	Ma10_t25430	Ma10_p25430	chr10	33573725	33574875	612	203	22.51	6.45
MabHLH239	Ma10_g25560	Ma10_t25560	Ma10_p25560	chr10	33637554	33638228	675	224	23.66	9.4
MabHLH240	Ma10_g25740	Ma10_t25740	Ma10_p25740	chr10	33728005	33728346	270	89	10.22	7.93
MabHLH241	Ma10_g26460	Ma10_t26460	Ma10_p26460	chr10	34137721	34140100	684	227	25.402	6.84
MabHLH242	Ma10_g28930	Ma10_t28930	Ma10_p28930	chr10	35657832	35659767	1335	444	48.17	6.46
MabHLH243	Ma10_g30230	Ma10_t30230	Ma10_p30230	chr10	36582090	36583536	930	309	33.89	6.27
MabHLH244	Ma10_g30740	Ma10_t30740	Ma10_p30740	chr10	37023713	37025953	1344	447	45.87	6.07
MabHLH245	Ma11_g00280	Ma11_t00280	Ma11_p00280	chr11	207467	208964	1038	622	37.78	8.26
MabHLH246	Ma11_g02640	Ma11_t02640	Ma11_p02640	chr11	1934283	1935883	1164	387	43.72	6.45
MabHLH247	Ma11_g03740	Ma11_t03740	Ma11_p03740	chr11	2789176	2791857	1950	649	72.49	6.2
MabHLH248	Ma11_g09210	Ma11_t09210	Ma11_p09210	chr11	7359110	7361728	1692	563	59.73	5.27
MabHLH249	Ma11_g11790	Ma11_t11790	Ma11_p11790	chr11	14917757	14919447	1113	370	40.07	5.77
MabHLH250	Ma11_g11950	Ma11_t11950	Ma11_p11950	chr11	15546710	15548107	753	250	27.75	6.84
MabHLH251	Ma11_g13250	Ma11_t13250	Ma11_p13250	chr11	17547936	17555386	717	238	26.11	5.59
MabHLH252	Ma11_g16060	Ma11_t16060	Ma11_p16060	chr11	21652362	21655383	1965	654	73.43	5.55
MabHLH253	Ma11_g16400	Ma11_t16400	Ma11_p16400	chr11	21929908	21931938	2031	676	72.89	6.02
MabHLH254	Ma11_g17930	Ma11_t17930	Ma11_p17930	chr11	23113635	23114261	627	208	23.15	6.36
MabHLH255	Ma11_g19640	Ma11_t19640	Ma11_p19640	chr11	24418735	24423703	1869	622	70.34	6.13
MabHLH256	Ma11_g19820	Ma11_t19820	Ma11_p19820	chr11	24530878	24532115	1059	352	39.81	7.26
MabHLH257	Ma11_g21600	Ma11_t21600	Ma11_p21600	chr11	25684881	25686530	912	303	33.33	7.26
MabHLH258	Ma11_g21710	Ma11_t21710	Ma11_p21710	chr11	25740820	25742910	2091	696	75.08	6.36
MabHLH259	Ma00_g02280	Ma00_t02280	Ma00_p02280	chrun	-	-	885	294	32.75	5.18

## Sheet: Table 2
Table 2. The accession numbers of bHLHs in banana, rice and Arabidopsis
Gene name	Gene ID	Gene name	Gene ID	Gene name	Gene ID
MabHLH001	Ma01_p00280	AtbHLH001	At5g41315	OsbHLH001	LOC_Os01g70310
MabHLH002	Ma01_p02640	AtbHLH002	At1g63650	OsbHLH002	LOC_Os11g32100
MabHLH003	Ma01_p02760	AtbHLH003	At4g16430	OsbHLH003	LOC_Os03g04310
MabHLH004	Ma01_p03440	AtbHLH004	At4g17880	OsbHLH004	LOC_Os10g39750
MabHLH005	Ma01_p05550	AtbHLH005	At5g46760	OsbHLH005	LOC_Os02g02820
MabHLH006	Ma01_p07890	AtbHLH006	At1g32640	OsbHLH006	LOC_Os04g23550
MabHLH007	Ma01_p07920	AtbHLH007	At1g03040	OsbHLH007	LOC_Os04g23440
MabHLH008	Ma01_p10120	AtbHLH008	At1g09530	OsbHLH008	LOC_Os01g13460
MabHLH009	Ma01_p12160	AtbHLH009	At2g43010	OsbHLH009	LOC_Os10g42430
MabHLH010	Ma01_p12260	AtbHLH010	At2g31220	OsbHLH010	LOC_Os01g50940
MabHLH011	Ma01_p12390	AtbHLH011	At4g36060	OsbHLH011	LOC_Os08g43070
MabHLH012	Ma01_p12830	AtbHLH012	At4g00480	OsbHLH012	LOC_Os01g39480
MabHLH013	Ma01_p14360	AtbHLH013	At1g01260	OsbHLH013	LOC_Os04g47080
MabHLH014	Ma01_p14630	AtbHLH014	At4g00870	OsbHLH014	LOC_Os11g15210
MabHLH015	Ma01_p17410	AtbHLH015	At2g20180	OsbHLH015	LOC_Os04g47040
MabHLH016	Ma01_p19840	AtbHLH016	At4g00050	OsbHLH016	LOC_Os04g47059
MabHLH017	Ma01_p20760	AtbHLH017	At2g46510	OsbHLH017	LOC_Os07g11020
MabHLH018	Ma01_p21980	AtbHLH018	At2g22750	OsbHLH018	LOC_Os03g51580
MabHLH019	Ma01_p22460	AtbHLH019	At2g22760	OsbHLH019	LOC_Os03g12760
MabHLH020	Ma01_p22810	AtbHLH020	At2g22770	OsbHLH020	LOC_Os03g46860
MabHLH021	Ma01_p23240	AtbHLH021	At2g16910	OsbHLH021	LOC_Os12g43620
MabHLH022	Ma02_p07380	AtbHLH022	At4g21330	OsbHLH022	LOC_Os03g46790
MabHLH023	Ma02_p07980	AtbHLH023	At4g28790	OsbHLH023	LOC_Os10g01530
MabHLH024	Ma02_p08030	AtbHLH024	At4g36930	OsbHLH024	LOC_Os01g39330
MabHLH025	Ma02_p09300	AtbHLH025	At4g37850	OsbHLH025	LOC_Os01g09990
MabHLH026	Ma02_p09310	AtbHLH026	At1g02340	OsbHLH026	LOC_Os01g09930
MabHLH027	Ma02_p10480	AtbHLH027	At4g29930	OsbHLH027	LOC_Os01g09900
MabHLH028	Ma02_p11480	AtbHLH028	At5g46830	OsbHLH028	LOC_Os05g11070
MabHLH029	Ma02_p16200	AtbHLH029	At2g28160	OsbHLH029	LOC_Os02g12820
MabHLH030	Ma02_p16270	AtbHLH030	At1g68810	OsbHLH030	LOC_Os06g37410
MabHLH031	Ma02_p16490	AtbHLH031	At1g59640	OsbHLH031	LOC_Os08g38210
MabHLH032	Ma02_p16690	AtbHLH032	At3g25710	OsbHLH032	LOC_Os09g29930
MabHLH033	Ma02_p18870	AtbHLH033	At1g12860	OsbHLH034	LOC_Os02g49480
MabHLH034	Ma02_p19840	AtbHLH034	At3g23210	OsbHLH035	LOC_Os01g06640
MabHLH035	Ma02_p21930	AtbHLH035	At5g57150	OsbHLH036	LOC_Os05g07120
MabHLH036	Ma02_p23120	AtbHLH036	At5g51780	OsbHLH037	LOC_Os01g11910
MabHLH037	Ma02_p23310	AtbHLH037	At3g50330	OsbHLH038	LOC_Os08g33590
MabHLH038	Ma02_p24160	AtbHLH038	At3g56970	OsbHLH039	LOC_Os09g24490
MabHLH039	Ma02_p24740	AtbHLH039	At3g56980	OsbHLH040	LOC_Os03g15440
MabHLH040	Ma03_p00290	AtbHLH040	At4g00120	OsbHLH041	LOC_Os03g59670
MabHLH041	Ma03_p00570	AtbHLH041	At5g56960	OsbHLH042	LOC_Os08g37290
MabHLH042	Ma03_p01140	AtbHLH042	At4g09820	OsbHLH043	LOC_Os09g28900
MabHLH043	Ma03_p01460	AtbHLH043	At5g09750	OsbHLH044	LOC_Os03g08930
MabHLH044	Ma03_p02360	AtbHLH044	At1g18400	OsbHLH045	LOC_Os10g23050
MabHLH045	Ma03_p03320	AtbHLH045	At3g06120	OsbHLH046	LOC_Os09g29360
MabHLH046	Ma03_p04500	AtbHLH046	At5g08130	OsbHLH047	LOC_Os08g37730
MabHLH047	Ma03_p06310	AtbHLH047	At3g47640	OsbHLH048	LOC_Os02g52190
MabHLH048	Ma03_p06610	AtbHLH048	At2g42300	OsbHLH049	LOC_Os02g46560
MabHLH049	Ma03_p06720	AtbHLH049	At1g68920	OsbHLH050	LOC_Os04g50090
MabHLH050	Ma03_p06950	AtbHLH050	At1g73830	OsbHLH051	LOC_Os05g50900
MabHLH051	Ma03_p09890	AtbHLH051	At2g40200	OsbHLH052	LOC_Os03g03000
MabHLH052	Ma03_p10320	AtbHLH052	At1g30670	OsbHLH053	LOC_Os02g15760
MabHLH053	Ma03_p10360	AtbHLH053	At2g34820	OsbHLH054	LOC_Os06g33450
MabHLH054	Ma03_p10840	AtbHLH054	At1g27740	OsbHLH055	LOC_Os05g51820
MabHLH055	Ma03_p14530	AtbHLH055	At1g12540	OsbHLH056	LOC_Os01g72370
MabHLH056	Ma03_p16110	AtbHLH056	At4g28800	OsbHLH057	LOC_Os07g35870
MabHLH057	Ma03_p16180	AtbHLH057	At4g01460	OsbHLH058	LOC_Os05g38140
MabHLH058	Ma03_p17630	AtbHLH058	At4g36540	OsbHLH059	LOC_Os02g02480
MabHLH059	Ma03_p18660	AtbHLH059	At4g02590	OsbHLH060	LOC_Os08g04390
MabHLH060	Ma03_p19700	AtbHLH060	At3g57800	OsbHLH061	LOC_Os11g38870
MabHLH061	Ma03_p20780	AtbHLH061	At5g10570	OsbHLH062	LOC_Os07g43530
MabHLH062	Ma03_p21690	AtbHLH062	At3g07340	OsbHLH063	LOC_Os03g26210
MabHLH063	Ma03_p22400	AtbHLH063	At4g34530	OsbHLH064	LOC_Os02g23823
MabHLH064	Ma03_p24270	AtbHLH064	At2g18300	OsbHLH065	LOC_Os04g41570
MabHLH065	Ma03_p27160	AtbHLH065	At3g59060	OsbHLH066	LOC_Os03g55220
MabHLH066	Ma03_p27360	AtbHLH066	At2g24260	OsbHLH067	LOC_Os05g42180
MabHLH067	Ma03_p30510	AtbHLH068	At4g29100	OsbHLH068	LOC_Os04g53990
MabHLH068	Ma03_p31810	AtbHLH069	At4g30980	OsbHLH069	LOC_Os01g57580
MabHLH069	Ma04_p00510	AtbHLH070	At2g46810	OsbHLH070	LOC_Os08g08160
MabHLH070	Ma04_p01920	AtbHLH071	At5g46690	OsbHLH071	LOC_Os01g01600
MabHLH071	Ma04_p03270	AtbHLH072	At5g61270	OsbHLH072	LOC_Os02g17680
MabHLH072	Ma04_p03280	AtbHLH073	At5g67110	OsbHLH073	LOC_Os05g14010
MabHLH073	Ma04_p05320	AtbHLH074	At1g10120	OsbHLH074	LOC_Os01g13000
MabHLH074	Ma04_p05360	AtbHLH075	At1g25330	OsbHLH075	LOC_Os04g47810
MabHLH075	Ma04_p08700	AtbHLH076	At1g26260	OsbHLH076	LOC_Os02g45010
MabHLH076	Ma04_p09100	AtbHLH077	At3g23690	OsbHLH077	LOC_Os07g28890
MabHLH077	Ma04_p11130	AtbHLH078	At5g48560	OsbHLH078	LOC_Os03g17130
MabHLH078	Ma04_p12690	AtbHLH079	At5g62610	OsbHLH084	LOC_Os09g29830
MabHLH079	Ma04_p14560	AtbHLH080	At1g35460	OsbHLH085	LOC_Os06g16400
MabHLH080	Ma04_p16140	AtbHLH081	At4g09180	OsbHLH086	LOC_Os08g38080
MabHLH081	Ma04_p16400	AtbHLH082	At5g58010	OsbHLH087	LOC_Os03g12940
MabHLH082	Ma04_p17530	AtbHLH083	At1g66470	OsbHLH088	LOC_Os03g58830
MabHLH083	Ma04_p17980	AtbHLH084	At2g14760	OsbHLH096	LOC_Os02g35660
MabHLH084	Ma04_p19280	AtbHLH085	At4g33880	OsbHLH097	LOC_Os03g58330
MabHLH085	Ma04_p26180	AtbHLH086	At5g37800	OsbHLH098	LOC_Os07g08440
MabHLH086	Ma04_p27680	AtbHLH087	At3g21330	OsbHLH100	LOC_Os04g52770
MabHLH087	Ma04_p29590	AtbHLH088	At5g67060	OsbHLH101	LOC_Os12g41650
MabHLH088	Ma04_p29760	AtbHLH089	At1g06170	OsbHLH102	LOC_Os03g43810
MabHLH089	Ma04_p30630	AtbHLH090	At1g10610	OsbHLH103	LOC_Os07g05010
MabHLH090	Ma04_p30910	AtbHLH091	At2g31210	OsbHLH104	LOC_Os01g18290
MabHLH091	Ma04_p38300	AtbHLH092	At5g43650	OsbHLH106	LOC_Os02g56140
MabHLH092	Ma05_p01190	AtbHLH093	At5g65640	OsbHLH107	LOC_Os06g06900
MabHLH093	Ma05_p02230	AtbHLH094	At1g22490	OsbHLH108	LOC_Os01g67480
MabHLH094	Ma05_p02990	AtbHLH095	At1g49770	OsbHLH109	LOC_Os02g39140
MabHLH095	Ma05_p05190	AtbHLH096	At1g72210	OsbHLH110	LOC_Os04g41229
MabHLH096	Ma05_p06550	AtbHLH097	At3g24140	OsbHLH111	LOC_Os08g39630
MabHLH097	Ma05_p08730	AtbHLH098	At5g53210	OsbHLH112	LOC_Os10g40740
MabHLH098	Ma05_p09200	AtbHLH099	At5g65320	OsbHLH113	LOC_Os02g55250
MabHLH099	Ma05_p15880	AtbHLH100	At2g41240	OsbHLH114	LOC_Os06g08500
MabHLH100	Ma05_p19380	AtbHLH101	At5g04150	OsbHLH115	LOC_Os12g40730
MabHLH101	Ma05_p20130	AtbHLH102	At1g69010	OsbHLH116	LOC_Os01g38610
MabHLH102	Ma05_p20340	AtbHLH103	At4g21340	OsbHLH117	LOC_Os01g51140
MabHLH103	Ma05_p20730	AtbHLH104	At4g14410	OsbHLH118	LOC_Os05g46370
MabHLH104	Ma05_p22710	AtbHLH105	At5g54680	OsbHLH119	LOC_Os09g28210
MabHLH105	Ma05_p23010	AtbHLH106	At2g41130	OsbHLH120	LOC_Os08g36740
MabHLH106	Ma05_p24730	AtbHLH107	At3g56770	OsbHLH121	LOC_Os06g10820
MabHLH107	Ma05_p25740	AtbHLH108	At1g25310	OsbHLH122	LOC_Os01g61480
MabHLH108	Ma05_p26050	AtbHLH109	At1g68240	OsbHLH123	LOC_Os08g01700
MabHLH109	Ma05_p31750	AtbHLH110	At1g27660	OsbHLH124	LOC_Os01g02110
MabHLH110	Ma06_p00430	AtbHLH112	At1g61660	OsbHLH125	LOC_Os02g48060
MabHLH111	Ma06_p02630	AtbHLH113	At3g19500	OsbHLH126	LOC_Os06g30090
MabHLH112	Ma06_p02880	AtbHLH114	At4g05170	OsbHLH127	LOC_Os07g39940
MabHLH113	Ma06_p03850	AtbHLH115	At1g51070	OsbHLH128	LOC_Os03g10770
MabHLH114	Ma06_p04430	AtbHLH116	At3g26744	OsbHLH129	LOC_Os12g39850
MabHLH115	Ma06_p09400	AtbHLH117	At3g22100	OsbHLH130	LOC_Os03g42100
MabHLH116	Ma06_p09680	AtbHLH118	At4g25400	OsbHLH131	LOC_Os11g41640
MabHLH117	Ma06_p10630	AtbHLH119	At4g28811	OsbHLH132	LOC_Os12g32400
MabHLH118	Ma06_p10910	AtbHLH120	At5g51790	OsbHLH133	LOC_Os03g55550
MabHLH119	Ma06_p11260	AtbHLH121	At3g19860	OsbHLH134	LOC_Os12g40590
MabHLH120	Ma06_p11760	AtbHLH122	At1g51140	OsbHLH135	LOC_Os12g40710
MabHLH121	Ma06_p17980	AtbHLH123	At3g20640	OsbHLH136	LOC_Os12g40630
MabHLH122	Ma06_p18360	AtbHLH124	At2g46970	OsbHLH137	LOC_Os03g27390
MabHLH123	Ma06_p19890	AtbHLH125	At1g62975	OsbHLH138	LOC_Os02g21090
MabHLH124	Ma06_p24180	AtbHLH126	At4g25410	OsbHLH139	LOC_Os03g39432
MabHLH125	Ma06_p26210	AtbHLH127	At4g28815	OsbHLH140	LOC_Os04g51070
MabHLH126	Ma06_p29370	AtbHLH128	At1g05805	OsbHLH141	LOC_Os01g18870
MabHLH127	Ma06_p29530	AtbHLH129	At2g43140	OsbHLH142	LOC_Os09g31300
MabHLH128	Ma06_p31780	AtbHLH130	At2g42280	OsbHLH143	LOC_Os04g35010
MabHLH129	Ma06_p32270	AtbHLH132	At4g38070	OsbHLH144	LOC_Os04g35000
MabHLH130	Ma06_p32610	AtbHLH135	At3g62090	OsbHLH146	LOC_Os02g34370
MabHLH131	Ma06_p33060	AtbHLH137	At5g50915	OsbHLH147	LOC_Os03g53020
MabHLH132	Ma06_p37230	AtbHLH138	At2g31215	OsbHLH148	LOC_Os01g64560
MabHLH133	Ma06_p37600	AtbHLH139	At5g43175	OsbHLH149	LOC_Os12g06330
MabHLH134	Ma06_p37700	AtbHLH140	At5g01310	OsbHLH150	LOC_Os11g06010
MabHLH135	Ma06_p38080	AtbHLH141	At5g38860	OsbHLH151	LOC_Os03g56950
MabHLH136	Ma06_p38110	AtbHLH142	At5g64340	OsbHLH152	LOC_Os03g07540
MabHLH137	Ma07_p00790	AtbHLH143	At5g09460	OsbHLH153	LOC_Os04g54900
MabHLH138	Ma07_p01740	AtbHLH144	At1g29950	OsbHLH154	LOC_Os06g50900
MabHLH139	Ma07_p02820	AtbHLH146	At4g30180	OsbHLH155	LOC_Os04g31290
MabHLH140	Ma07_p04040	AtbHLH147	At3g17100	OsbHLH156	LOC_Os02g08220
MabHLH141	Ma07_p04290	AtbHLH153	At1g05710	OsbHLH158	LOC_Os05g06520
MabHLH142	Ma07_p04810	AtbHLH154	At2g31730	OsbHLH159	LOC_Os11g02054
MabHLH143	Ma07_p06450	AtbHLH155	At2g31280	OsbHLH162	LOC_Os07g47960
MabHLH144	Ma07_p07300	AtbHLH156	At2g27230	OsbHLH163	LOC_Os07g36460
MabHLH145	Ma07_p08910	AtbHLH160	At1g71200	OsbHLH164	LOC_Os01g39580
MabHLH146	Ma07_p10540	AtbHLH161	At2g43060	OsbHLH165	LOC_Os03g21970
MabHLH147	Ma07_p10610	AtbHLH162	At4g20970	OsbHLH166	LOC_Os09g34330
MabHLH148	Ma07_p11370			OsbHLH167	LOC_Os02g54870
MabHLH149	Ma07_p11850			OsbHLH168	LOC_Os01g43950
MabHLH150	Ma07_p12620			OsbHLH169	LOC_Os02g51320
MabHLH151	Ma07_p13630			OsbHLH170	LOC_Os08g16030
MabHLH152	Ma07_p14560			OsbHLH171	LOC_Os06g12210
MabHLH153	Ma07_p15780			OsbHLH172	LOC_Os10g26460
MabHLH154	Ma07_p19250			OsbHLH173	LOC_Os10g26410
MabHLH155	Ma07_p21600			OsbHLH174	LOC_Os04g56500
MabHLH156	Ma07_p22050			OsbHLH175	LOC_Os03g19780
MabHLH157	Ma07_p22330			OsbHLH177	LOC_Os07g48900
MabHLH158	Ma07_p22650
MabHLH159	Ma07_p22730
MabHLH160	Ma07_p22890
MabHLH161	Ma07_p24260
MabHLH162	Ma07_p24870
MabHLH163	Ma07_p28500
MabHLH164	Ma08_p01270
MabHLH165	Ma08_p05010
MabHLH166	Ma08_p05210
MabHLH167	Ma08_p08860
MabHLH168	Ma08_p10850
MabHLH169	Ma08_p11190
MabHLH170	Ma08_p12100
MabHLH171	Ma08_p14280
MabHLH172	Ma08_p14610
MabHLH173	Ma08_p15640
MabHLH174	Ma08_p17380
MabHLH175	Ma08_p18460
MabHLH176	Ma08_p19780
MabHLH177	Ma08_p20350
MabHLH178	Ma08_p20960
MabHLH179	Ma08_p21160
MabHLH180	Ma08_p22850
MabHLH181	Ma08_p24050
MabHLH182	Ma08_p24730
MabHLH183	Ma08_p25290
MabHLH184	Ma08_p25740
MabHLH185	Ma08_p27020
MabHLH186	Ma08_p27190
MabHLH187	Ma08_p28960
MabHLH188	Ma08_p32450
MabHLH189	Ma08_p33520
MabHLH190	Ma08_p34470
MabHLH191	Ma08_p34780
MabHLH192	Ma09_p00560
MabHLH193	Ma09_p07040
MabHLH194	Ma09_p08430
MabHLH195	Ma09_p08670
MabHLH196	Ma09_p09230
MabHLH197	Ma09_p09380
MabHLH198	Ma09_p10630
MabHLH199	Ma09_p10920
MabHLH200	Ma09_p14430
MabHLH201	Ma09_p14550
MabHLH202	Ma09_p14780
MabHLH203	Ma09_p17480
MabHLH204	Ma09_p17870
MabHLH205	Ma09_p17890
MabHLH206	Ma09_p19970
MabHLH207	Ma09_p20790
MabHLH208	Ma09_p21380
MabHLH209	Ma09_p22830
MabHLH210	Ma09_p23450
MabHLH211	Ma09_p26010
MabHLH212	Ma09_p28100
MabHLH213	Ma09_p28400
MabHLH214	Ma09_p28720
MabHLH215	Ma09_p28730
MabHLH216	Ma09_p29710
MabHLH217	Ma10_p00280
MabHLH218	Ma10_p02630
MabHLH219	Ma10_p05870
MabHLH220	Ma10_p06760
MabHLH221	Ma10_p08560
MabHLH222	Ma10_p09140
MabHLH223	Ma10_p10030
MabHLH224	Ma10_p12220
MabHLH225	Ma10_p12250
MabHLH226	Ma10_p14490
MabHLH227	Ma10_p17170
MabHLH228	Ma10_p18370
MabHLH229	Ma10_p18400
MabHLH230	Ma10_p19220
MabHLH231	Ma10_p19830
MabHLH232	Ma10_p20230
MabHLH233	Ma10_p20480
MabHLH234	Ma10_p21150
MabHLH235	Ma10_p22250
MabHLH236	Ma10_p23280
MabHLH237	Ma10_p23960
MabHLH238	Ma10_p25430
MabHLH239	Ma10_p25560
MabHLH240	Ma10_p25740
MabHLH241	Ma10_p26460
MabHLH242	Ma10_p28930
MabHLH243	Ma10_p30230
MabHLH244	Ma10_p30740
MabHLH245	Ma11_p00280
MabHLH246	Ma11_p02640
MabHLH247	Ma11_p03740
MabHLH248	Ma11_p09210
MabHLH249	Ma11_p11790
MabHLH250	Ma11_p11950
MabHLH251	Ma11_p13250
MabHLH252	Ma11_p16060
MabHLH253	Ma11_p16400
MabHLH254	Ma11_p17930
MabHLH255	Ma11_p19640
MabHLH256	Ma11_p19820
MabHLH257	Ma11_p21600
MabHLH258	Ma11_p21710
MabHLH259	Ma00_p02280

## Sheet: Table 3
Table 3. Gene list of segmental and tandem duplication
Segmental duplication
Gene ID	location	parameter
MabHLH004	Block11_chr01	3877
MabHLH006	Block10_chr01	4202
MabHLH012	Block9_chr01	4500
MabHLH023	Block10_chr02	4995
MabHLH024	Block10_chr02	5000
MabHLH035	Block3_chr02	701
MabHLH036	Block3_chr02	922
MabHLH037	Block3_chr02	922
MabHLH038	Block3_chr02	1079
MabHLH044	Block3_chr03	922
MabHLH045	Block3_chr03	701
MabHLH046	Block7_chr03	1432
MabHLH048	Block7_chr03	6177
MabHLH049	Block7_chr03	6184
MabHLH051	Block7_chr03	6431
MabHLH052	Block7_chr03	6467
MabHLH053	Block7_chr03	6471
MabHLH054	Block7_chr03	6502
MabHLH060	Block3_chr03	6857
MabHLH061	Block12_chr03	6918
MabHLH066	Block1_chr03	7293
MabHLH068	Block4_chr03	7602
MabHLH070	Block7_chr04	1432
MabHLH071	Block4_chr04	7602
MabHLH079	Block4_chr04	7602
MabHLH087	Block8_chr04	8627
MabHLH091	Block8_chr04	9033
MabHLH093	Block8_chr05	9033
MabHLH095	Block7_chr05	6177
MabHLH096	Block7_chr05	9317
MabHLH102	Block2_chr05	3082
MabHLH104	Block2_chr05	2168
MabHLH107	Block12_chr05	6918
MabHLH113	Block12_chr06	1856
MabHLH114	Block12_chr06	6918
MabHLH115	Block3_chr06	6857
MabHLH117	Block3_chr06	1180
MabHLH119	Block3_chr06	1129
MabHLH120	Block3_chr06	1079
MabHLH121	Block3_chr06	512
MabHLH122	Block3_chr06	6857
MabHLH127	Block10_chr06	5000
MabHLH132	Block5_chr06	11156
MabHLH137	Block8_chr07	8627
MabHLH143	Block9_chr07	4500
MabHLH148	Block6_chr07	1542
MabHLH150	Block7_chr07	6177
MabHLH151	Block7_chr07	11814
MabHLH152	Block7_chr07	1306
MabHLH153	Block7_chr07	1432
MabHLH154	Block12_chr07	6918
MabHLH163	Block4_chr07	7602
MabHLH165	Block1_chr08	7293
MabHLH166	Block1_chr08	7293
MabHLH169	Block2_chr08	2248
MabHLH170	Block2_chr08	2168
MabHLH173	Block2_chr08	2745
MabHLH178	Block7_chr08	11814
MabHLH179	Block7_chr08	9317
MabHLH185	Block10_chr08	4202
MabHLH186	Block10_chr08	4202
MabHLH187	Block10_chr08	4995
MabHLH193	Block10_chr09	5000
MabHLH195	Block5_chr09	11156
MabHLH200	Block7_chr09	6177
MabHLH201	Block7_chr09	6184
MabHLH203	Block7_chr09	6431
MabHLH204	Block7_chr09	6467
MabHLH205	Block7_chr09	6471
MabHLH208	Block11_chr09	3877
MabHLH213	Block7_chr09	6502
MabHLH214	Block7_chr09	6471
MabHLH215	Block7_chr09	6467
MabHLH224	Block3_chr10	512
MabHLH226	Block3_chr10	701
MabHLH227	Block3_chr10	922
MabHLH229	Block3_chr10	922
MabHLH230	Block3_chr10	1079
MabHLH231	Block3_chr10	1129
MabHLH233	Block3_chr10	1180
MabHLH235	Block7_chr10	1306
MabHLH237	Block7_chr10	1432
MabHLH240	Block6_chr10	1542
MabHLH243	Block12_chr10	1856
MabHLH244	Block12_chr10	1856
MabHLH246	Block2_chr11	2168
MabHLH247	Block2_chr11	2248
MabHLH252	Block2_chr11	2248
MabHLH253	Block2_chr11	2745
MabHLH255	Block2_chr11	2248
MabHLH256	Block2_chr11	2168
MabHLH258	Block2_chr11	3082
Tandem duplication
Gene ID	Gene ID
MabHLH25	MabHLH26
MabHLH52	MabHLH53
MabHLH71	MabHLH72
MabHLH73	MabHLH74
MabHLH135	MabHLH136
MabHLH158	MabHLH159
MabHLH196	MabHLH197
MabHLH224	MabHLH225
MabHLH227	MabHLH228

## Sheet: Table 4
Table 4 Sample of tissues and stage/trement used for RNA-seq
Sample Name	Organ	Stage/Trement	Total Gb (replicate)	Accession number
BX0DAF	fruits	0 days after flowering	8.01511	CNX0051097
BX20DAF	fruits	20 days after flowering	7.96134	CNX0051098
BX80DAF-0DPH	fruits	80 days after flowering/ 0 days postharvest	7.92914	CNX0051086
BX8DPH	fruits	8 days postharvest	7.91337	CNX0051087
BX14DPH	fruits	14 days postharvest	7.92422	CNX0051099
BX-control	leaves	non treatment	8.13875	CNX0051090
BX-osmotic	leaves	200 mM mannitol for 7 days	7.87471	CNX0051103
BX-salt	leaves	300 mM NaCl for 7 days	8.05187	CNX0051104
BX-Cold	leaves	4°C for 22 h	8.14338	CNX0051091
BX-0DPI	roots	uninoculated	8.00814	CNX0051108
BX-2DPI	roots	2 days post inoculated Foc TR4	8.08458	CNX0051109

## Sheet: Table 5
Table 5 The expression data of MabHLH genes in banana fruit development and ripening stages
GeneID	0DAF	20DAF	80DAF_0DPH	8DPH	14DPH
MabHLH048	131.767	125.848	0.232273	0.157984	0.017087
MabHLH251	95.0499	97.9749	38.9679	36.405	78.4444
MabHLH140	74.0827	82.6124	3.64229	1.3919	0.0360685
MabHLH064	62.7555	58.5691	16.7658	25.992	45.0376
MabHLH231	59.3483	23.7788	3.26226	1.33684	0.541514
MabHLH006	59.0669	81.6544	6.11388	7.64416	11.3587
MabHLH186	57.707	112.059	3.37378	0.134913	1.68963
MabHLH155	56.7344	68.8906	40.7083	27.4832	15.0259
MabHLH051	54.5772	54.4584	105.098	204.922	102.815
MabHLH061	52.6397	0.457108	0	0	0
MabHLH219	50.1139	67.8043	8.36151	5.89226	1.18833
MabHLH034	48.8933	67.4467	143.241	112.204	42.7012
MabHLH102	47.0041	55.8132	29.3529	44.1637	18.0778
MabHLH228	44.6744	52.0072	0.0224943	0.0408596	0.702554
MabHLH225	43.2461	61.8975	225.254	65.5532	5.76465
MabHLH189	36.431	37.107	17.0004	15.8996	6.15875
MabHLH086	36.4187	38.1294	18.5293	3.45549	9.30942
MabHLH011	34.4508	40.1167	12.2766	6.67409	1.90804
MabHLH083	33.6517	53.0459	2.96824	9.31082	0.411252
MabHLH135	32.3337	43.6267	9.4206	7.43709	12.5939
MabHLH188	31.7785	25.1754	20.4069	7.6419	4.03155
MabHLH138	29.0089	38.6397	11.4384	9.47253	2.02491
MabHLH214	28.0065	37.8384	11.5409	3.74549	2.05416
MabHLH183	27.719	41.8356	5.50639	4.09988	0.734202
MabHLH085	27.5023	27.1998	9.80223	8.84775	11.3826
MabHLH248	27.2501	38.1111	0.0108084	0	0.0580295
MabHLH259	25.9023	15.9644	0.726388	0.0375354	0
MabHLH243	25.3879	36.0963	8.17969	0.967777	0.0525207
MabHLH204	24.9508	29.8903	5.54364	4.10985	0.146722
MabHLH010	23.335	25.2913	3.67454	7.26832	2.02352
MabHLH114	23.1362	104.529	0	0	0.062785
MabHLH004	22.5512	12.3642	6.43219	1.47941	0.0478326
MabHLH206	22.0551	26.0534	11.6985	10.8875	11.7294
MabHLH074	21.8045	23.494	23.3446	28.7185	32.467
MabHLH198	21.4778	31.2395	6.2696	6.35134	1.97343
MabHLH169	21.2293	32.6394	0.0465339	0.0253579	0.0332272
MabHLH252	20.9864	32.8868	0.196197	0.0169053	0.016487
MabHLH245	20.7353	29.4549	0.0884487	0.0640054	0.0156055
MabHLH258	20.2493	29.0952	68.4996	13.161	7.95404
MabHLH241	19.7122	22.5561	3.81583	2.51151	4.36654
MabHLH113	19.2632	30.1071	0.100744	0	0.10622
MabHLH125	19.1578	23.7527	0.550437	1.46679	0.0317821
MabHLH211	19.1418	22.1598	9.21414	9.59898	15.0071
MabHLH205	18.5119	43.0296	6.40936	1.94296	0.602951
MabHLH250	18.1457	20.8885	0	0	0.0218423
MabHLH094	18.0347	17.1977	6.06902	2.51454	5.71332
MabHLH016	17.8136	11.7172	0.372811	0	0
MabHLH139	17.129	11.8858	1.3278	19.5164	38.4869
MabHLH091	17.0891	3.18575	1.10542	0.16366	0.0803141
MabHLH253	17.0094	25.2826	7.30964	2.52231	0.545527
MabHLH057	16.2683	22.2546	37.9956	4.1462	0.328376
MabHLH035	16.1348	21.3534	13.8002	8.36302	1.13238
MabHLH242	16.0593	23.9381	1.80162	2.85996	0.0242675
MabHLH152	15.9878	18.3208	5.09515	6.44343	3.9936
MabHLH124	15.3241	24.0448	0.516313	0.477703	0.483376
MabHLH053	15.2883	13.5087	10.7781	7.05955	6.00676
MabHLH019	15.263	13.3192	30.5386	44.1681	15.1946
MabHLH185	14.979	27.8039	8.09312	23.8096	3.17701
MabHLH144	14.3909	20.4388	1.17456	0.232635	0.0328288
MabHLH235	14.2928	16.7786	6.77024	9.12688	9.66002
MabHLH175	14.0119	53.3637	0.277088	0.0629144	0
MabHLH062	13.9012	31.6087	0.751983	0.217039	0.0301648
MabHLH046	13.6855	18.1154	21.859	20.0332	14.4642
MabHLH044	13.5215	13.9076	0.818733	0.377589	0.0781118
MabHLH022	13.4081	15.5341	7.07448	2.64867	3.49973
MabHLH012	13.2614	15.0449	2.74737	0.396043	0.186957
MabHLH230	13.0904	16.2752	12.737	24.2508	1.37673
MabHLH161	12.9187	9.24465	0.300871	0	0.0367126
MabHLH150	12.7665	13.0953	75.6245	36.9526	0.216532
MabHLH166	12.5877	24.0091	5.00133	1.93684	2.08101
MabHLH116	12.5382	18.9939	5.66323	13.5271	60.9317
MabHLH045	12.2306	13.3245	11.3412	4.64326	2.47385
MabHLH036	11.8526	12.9537	3.46317	1.11419	0.948364
MabHLH227	11.7009	10.4591	2.76574	3.02079	2.36215
MabHLH141	11.2764	13.4233	5.74801	8.52121	14.3294
MabHLH182	11.2303	11.8321	0.301826	0.1823	0
MabHLH157	11.1768	16.6316	2.66963	2.48352	1.77609
MabHLH100	11.1107	9.18383	3.47696	0.364217	0.761711
MabHLH070	10.4021	14.3619	5.81229	2.52107	1.17162
MabHLH154	10.1344	47.4683	0.0708831	0.194784	0
MabHLH148	10.1278	11.677	10.5208	0	0
MabHLH127	9.96835	13.6293	1.54352	0.656976	0.799135
MabHLH153	9.765	52.7741	49.9328	6.98546	0.250159
MabHLH213	9.55161	8.63222	1.05908	1.81706	0.0131789
MabHLH173	9.24312	12.8422	8.46001	18.4685	8.72613
MabHLH233	8.95496	6.97401	0.0973454	0.412829	0.0286446
MabHLH017	8.89796	8.88339	0.442717	0.133979	0.490155
MabHLH073	8.67417	12.0392	8.20408	16.1928	25.2664
MabHLH131	8.65591	9.19168	1.7527	0.187234	0.0259592
MabHLH244	8.55739	11.5426	1.03609	0.185698	0.812364
MabHLH164	7.39149	6.29225	4.46332	3.24451	1.32422
MabHLH199	7.2265	10.4929	0.940669	0.854674	0.548757
MabHLH056	7.12552	6.77752	0.11121	0	0.642897
MabHLH028	5.87044	0.746809	0.47567	13.2068	0.82826
MabHLH190	5.41261	4.62502	8.27494	0.714849	0.546061
MabHLH193	5.33506	8.44873	3.8379	0.977422	0.18395
MabHLH147	5.06873	4.38206	9.90097	10.757	3.12939
MabHLH099	4.66286	11.5218	0	0.12454	53.8577
MabHLH156	4.58626	1.82272	0.337856	0.0401713	7.52991
MabHLH142	4.42695	5.35743	0.797479	1.58647	0.062233
MabHLH101	4.37685	15.3395	0	0.0590251	45.7288
MabHLH024	4.0045	3.42884	1.61268	32.783	356.038

## Sheet: Table 6
Table 6 The expression data (log2Ratio Cold/Control) of the MabHLH genes after cold treatment.
GeneID	Control	Cold	log2 Ratio Cold/Control
MabHLH004	27.1439	4.69122	-2.53259
MabHLH010	21.2822	7.22237	-1.5591
MabHLH040	30.2326	4.68295	-2.69062
MabHLH045	9.37869	3.55379	-1.40003
MabHLH062	1.37414	20.0329	3.86577
MabHLH066	1.88593	8.1719	2.11539
MabHLH067	0.824801	17.3031	4.39084
MabHLH075	40.1291	7.70506	-2.38077
MabHLH081	43.363	16.482	-1.39558
MabHLH082	6.563	3.1108	-1.07707
MabHLH103	39.091	19.2125	-1.02479
MabHLH117	5.20531	2.18078	-1.25514
MabHLH148	6.9417	3.07554	-1.17445
MabHLH151	0.1	6.73385	6.07336
MabHLH153	14.2051	73.0292	2.36206
MabHLH154	1.93413	19.2282	3.31347
MabHLH172	14.973	5.37384	-1.47834
MabHLH185	10.1387	58.6319	2.53181
MabHLH186	25.8248	1.46319	-4.14157
MabHLH205	9.10202	3.19486	-1.51043
MabHLH219	7.78489	3.78947	-1.03868
MabHLH230	2.60713	6.5461	1.32817
MabHLH231	5.53978	2.52118	-1.13573
MabHLH253	13.4408	6.67841	-1.00904

## Sheet: Table 7 Osmotic
Table 7 The expression data (log2Ratio Osmotic/Control) of the MabHLH genes after osmotic treatment.
GeneID	Control	Osmotic	log2 Ratio Osmotic/Control
MabHLH004	27.1439	8.08172	-1.74789
MabHLH013	14.7544	41.3293	1.48602
MabHLH034	52.2056	22.1346	-1.2379
MabHLH036	25.7382	10.1828	-1.33778
MabHLH040	30.2326	7.4716	-2.01662
MabHLH051	37.8493	83.032	1.1334
MabHLH057	17.2377	3.48855	-2.30487
MabHLH066	1.88593	5.07178	1.42721
MabHLH070	7.88323	1.68034	-2.23004
MabHLH075	40.1291	2.28458	-4.13465
MabHLH081	43.363	2.95895	-3.87331
MabHLH082	6.563	2.91472	-1.171
MabHLH091	45.0143	14.5715	-1.62724
MabHLH093	158.084	36.4227	-2.11778
MabHLH099	7.19203	31.284	2.12095
MabHLH106	43.0465	17.5801	-1.29195
MabHLH107	0.489583	6.32015	3.69033
MabHLH116	3.6093	11.3116	1.64801
MabHLH117	5.20531	0.302926	-4.10295
MabHLH128	0.850694	15.8047	4.21557
MabHLH141	27.4238	87.2512	1.66975
MabHLH142	13.8134	2.69873	-2.35572
MabHLH148	6.9417	1.33492	-2.37854
MabHLH151	0.1	27.9474	8.12657
MabHLH161	6.13547	3.01705	-1.02403
MabHLH166	9.52217	2.85233	-1.73915
MabHLH168	30.6758	12.6895	-1.27346
MabHLH173	9.82932	23.3731	1.24969
MabHLH186	25.8248	3.33771	-2.95183
MabHLH203	5.17421	20.1485	1.96126
MabHLH205	9.10202	3.85494	-1.23948
MabHLH209	5.67499	2.26457	-1.32538
MabHLH251	130.781	267.676	1.03334

## Sheet: Table 8 salt
Table 7 The expression data (log2Ratio Salt/Control) of the MabHLH genes after salt treatment.
GeneID	Control	Salt	log2 Ratio Salt/Control
MabHLH004	27.1439	10.0074	-1.43956
MabHLH019	64.6107	30.3542	-1.08988
MabHLH040	30.2326	10.1435	-1.57555
MabHLH066	1.88593	5.88966	1.64291
MabHLH075	40.1291	14.738	-1.44511
MabHLH081	43.363	10.65	-2.02561
MabHLH099	7.19203	19.0175	1.40286
MabHLH111	4.65029	30.6398	2.72002
MabHLH117	5.20531	1.88774	-1.46332
MabHLH139	5.27816	2.39577	-1.13954
MabHLH142	13.8134	6.5517	-1.07613
MabHLH148	6.9417	2.97087	-1.2244
MabHLH153	14.2051	41.932	1.56164
MabHLH205	9.10202	4.22745	-1.1064
MabHLH214	32.0401	13.2404	-1.27493
MabHLH224	1.24851	5.84051	2.22588
MabHLH253	13.4408	6.60547	-1.02489

## Sheet: Table 9
Table 7 The expression data (log2Ratio 2 DPI/0 DPI) of the MabHLH genes after inoculated Foc TR4.
GeneID	0 DPI	2 DPI	log2 Ratio 2 DPI/0 DP
MabHLH006	65.5526	25.8419	-1.34294
MabHLH016	2.78162	12.379	2.1539
MabHLH032	3.1645	17.1271	2.43623
MabHLH056	1.47203	5.93572	2.01161
MabHLH057	37.6393	11.268	-1.74001
MabHLH062	649.374	25.5166	-4.66954
MabHLH066	63.1599	4.67882	-3.75479
MabHLH067	272.764	18.2164	-3.90435
MabHLH079	19.9356	2.32229	-3.10173
MabHLH082	19.4808	7.28286	-1.41947
MabHLH086	9.96661	20.2988	1.02622
MabHLH120	7.12157	16.4053	1.20389
MabHLH127	13.6865	28.4669	1.05653
MabHLH153	441.926	46.3469	-3.25326
MabHLH165	2.16067	5.02128	1.21658
MabHLH178	14.8056	2.68835	-2.46135
MabHLH185	203.064	30.0165	-2.75811
MabHLH186	5.50625	12.1553	1.14244
MabHLH190	4.97423	10.2778	1.04698
MabHLH210	10.4831	2.01206	-2.38131
MabHLH235	23.0399	9.61684	-1.2605
MabHLH236	10.8911	3.43548	-1.66456
MabHLH252	4.70244	9.59208	1.02843
MabHLH253	26.0516	12.0336	-1.1143
MabHLH259	8.32659	17.3854	1.06208

## Sheet: Table 10
Table 10. Gene list of MabHLHs in three model and number of associated genes
Model	Gene ID	Number of associated genes
Model 1	MabHLH011	345
	MabHLH017	1093
	MabHLH048	646
	MabHLH055	13
	MabHLH083	239
	MabHLH113	1962
	MabHLH124	2
	MabHLH125	2510
	MabHLH133	741
	MabHLH136	226
	MabHLH140	2403
	MabHLH169	1957
	MabHLH182	357
	MabHLH183	379
	MabHLH186	524
	MabHLH198	342
	MabHLH199	1041
	MabHLH204	597
	MabHLH205	565
	MabHLH219	2298
	MabHLH227	285
	MabHLH228	2136
	MabHLH233	222
	MabHLH237	767
	MabHLH242	510
	MabHLH243	597
	MabHLH244	1507
	MabHLH245	2439
	MabHLH248	2314
	MabHLH252	472
Model 2	MabHLH032	129
	MabHLH062	510
	MabHLH066	494
	MabHLH067	569
	MabHLH071	133
	MabHLH079	530
	MabHLH134	125
	MabHLH153	417
	MabHLH163	290
	MabHLH173	85
	MabHLH178	614
	MabHLH180	351
	MabHLH185	379
	MabHLH207	257
	MabHLH208	12
	MabHLH210	519
	MabHLH226	448
Model 3	MabHLH015	452
	MabHLH024	603
	MabHLH101	34
	MabHLH116	38

[truncated: 2 more sheets: Table 11, Table 12]
